# Supplementary material for: Direct synthesis of hexitols from microcrystalline cellulose and birch over zirconium(iv) phosphate supported nickel catalysts and the mechanism study
Source: Royal Society of Chemistry journal article supplement (doi:10.1039/d0gc03745a), 2021-01-01
Supplement: d0gc03745a1.pdf [file d0gc03745a1.pdf]

Supporting Information

Direct Synthesis of Hexitols from Microcrystalline Cellulose and Birch over Zirconium (IV)

Phosphate Supported Nickel Catalysts and the Mechanism Study

**Table S1.** The structure of Bronsted and Lewis acid site of ZrP.

| Catalyst | Bronsted site                                                                     | Lewis site                                                                         | Ref. |
|----------|-----------------------------------------------------------------------------------|------------------------------------------------------------------------------------|------|
| ZrP      | 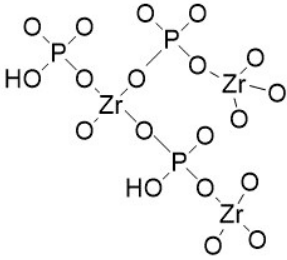 |  | 1    |

**Table S2.** The NH<sub>3</sub> desorption peaks area of screened catalysts.

| Catalyst              | NH <sub>3</sub> desorption area |
|-----------------------|---------------------------------|
| Ni/CeP                | 4.8042                          |
| Ni/TiP                | 4.9208                          |
| Ni/ZrP <sub>0.5</sub> | 7.6843                          |
| Ni/ZrP <sub>1</sub>   | 8.2315                          |
| Ni/ZrP <sub>1.5</sub> | 9.5051                          |
| Ni/ZrP <sub>2</sub>   | 15.2321                         |
| Ni/ZrP <sub>3</sub>   | 10.9141                         |

**Table S3.** Metal contents of Ni/ZrP<sub>2</sub> before and after recycle.

|                                  | Content (wt%) |
|----------------------------------|---------------|
|                                  | Ni            |
| Ni/ZrP <sub>2</sub>              | 19.48         |
| Ni/ZrP <sub>2</sub> after 3 runs | 14.30         |

**Table S4.** Metal contents of the solution after reaction.<sup>a</sup>

|                         | Content (ug/ml) |      |      |
|-------------------------|-----------------|------|------|
|                         | Ni              | Zr   | P    |
| Solution after reaction | 78.99           | None | None |

a: The volume of the reaction solution is 10 ml.

**Table S5.** Element analysis of C, H, N contents in birch wood.

| Entry   | C (%) | H (%) | N (%) |
|---------|-------|-------|-------|
| 1       | 47.65 | 6.469 | 0     |
| 2       | 47.66 | 6.392 | 0.064 |
| Average | 47.66 | 6.431 | 0.032 |

Elemental analysis for C, H, N of birch wood was taken by a Vario ELIII elemental analyzer.

**Table S6.** The masses of product after conversion of birch wood.

| Entry | Substrate | Catalyst            | Amount of product (g/biomass-g) |         |               |            |
|-------|-----------|---------------------|---------------------------------|---------|---------------|------------|
|       |           |                     | Sorbitol                        | Xylitol | 1, 4-Sorbitan | Isosorbide |
| birch |           |                     |                                 |         |               |            |
| 1     | sawdust   | Ni/ZrP <sub>2</sub> | 0.2718                          | 0.1582  | 0.0180        | 0.0161     |

Reaction conditions: 150 mg of substrate, 100 mg of Ni/ZrP<sub>2</sub> with Ni loading of 20%, 5 ml of H<sub>2</sub>O, 5 ml methanol, 4 MPa H<sub>2</sub>, 200 °C, 10 h.

**Table S7.** The H<sub>2</sub> desorption peaks area of Ni/ZrP<sub>2</sub> with different Ni content.

| Catalyst                | H <sub>2</sub> desorption area |
|-------------------------|--------------------------------|
| 5% Ni/ZrP <sub>2</sub>  | 298.99                         |
| 10% Ni/ZrP <sub>2</sub> | 333.48                         |
| 15% Ni/ZrP <sub>2</sub> | 565.90                         |
| 20% Ni/ZrP <sub>2</sub> | 1295.20                        |
| 25% Ni/ZrP <sub>2</sub> | 901.78                         |
| 30% Ni/ZrP <sub>2</sub> | 887.36                         |

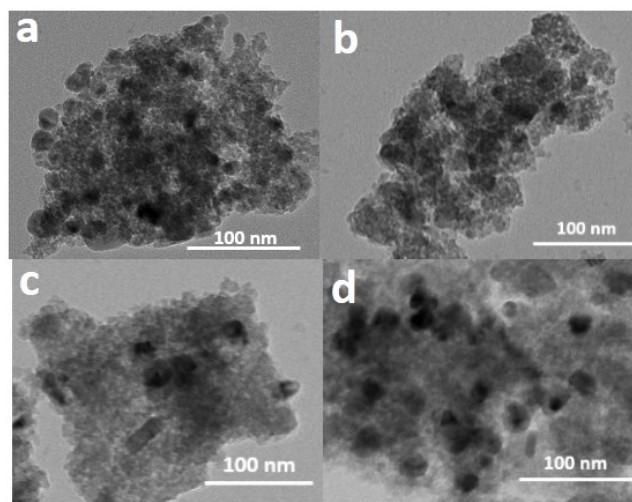

**Figure S1.** The TEM images of (a) Ni/ZrP<sub>0.5</sub>, (b) Ni/ZrP<sub>1</sub>, (c) Ni/ZrP<sub>1.5</sub>, and (d) Ni/ZrP<sub>3</sub>. The Ni loading of catalysts is 15%.

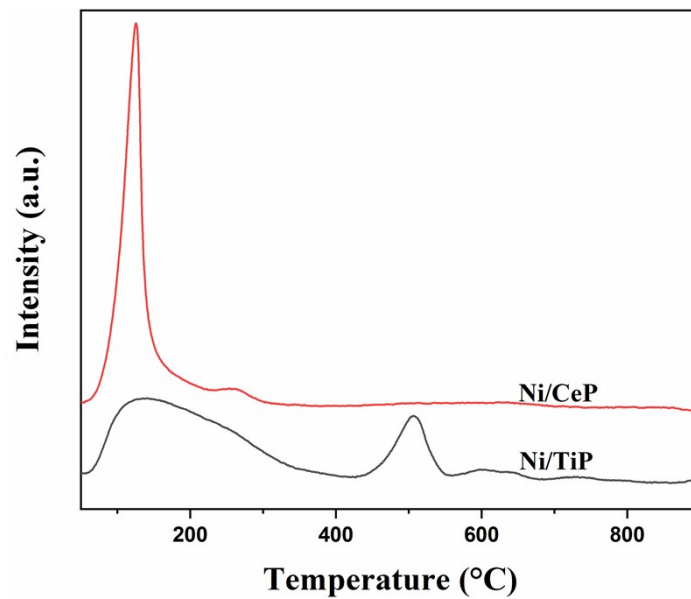

Figure S2.  $\text{NH}_3$ -TPD profiles of Ni/CeP and Ni/TiP catalysts. The Ni loading of catalysts is 15%.

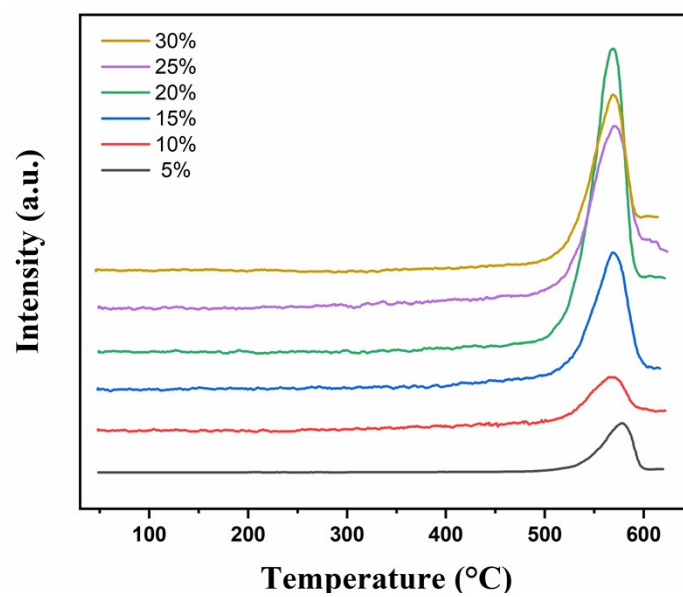

Figure S3.  $\text{H}_2$ -TPD profiles for Ni/ZrP<sub>2</sub> with different Ni content.

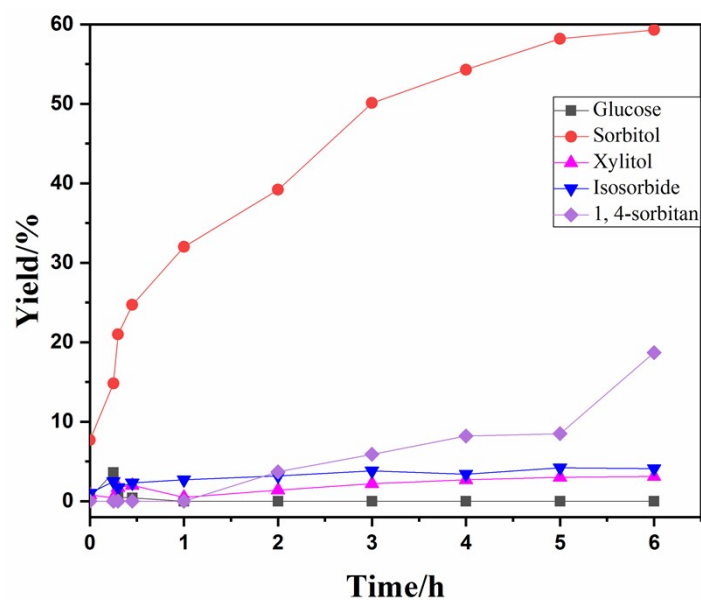

**Figure S4.** Product distributions of cellulose conversion as function of time. Reaction conditions: 50 mg of microcrystalline cellulose, 50 mg of Ni/ZrP<sub>2</sub> with Ni loading of 20%, 10 ml of H<sub>2</sub>O, 4 MPa H<sub>2</sub>, 200 °C.

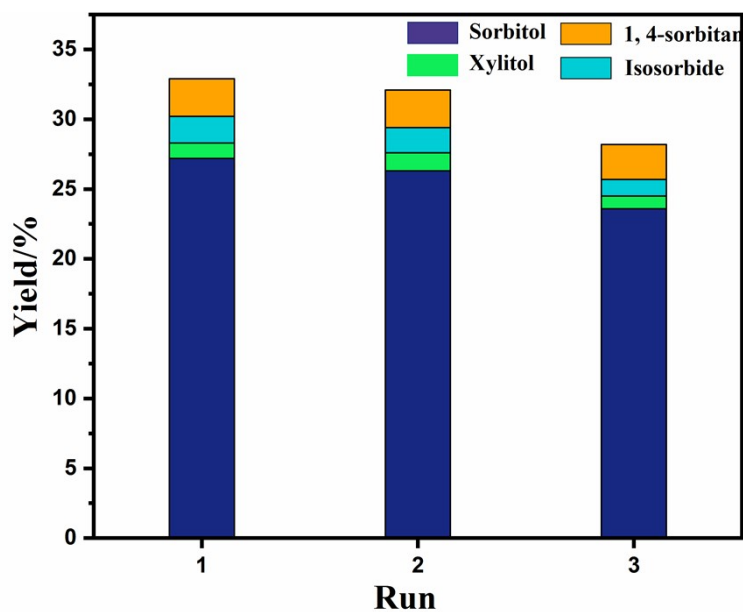

**Figure S5.** Results of recycle test for MCC conversion. Reaction conditions: 50 mg of microcrystalline cellulose, 50 mg of Ni/ZrP<sub>2</sub> with Ni loading of 20%, 10 ml of H<sub>2</sub>O, 200 °C, 4 MPa H<sub>2</sub>, 1h.

**Reference:**

1. Rao, K. N.; Sridhar, A.; Lee, A. F.; Tavener, S. J.; Young, N. A.; Wilson, K., *Green Chem.*, 2006, 8 (9), 790-797.
